# Supplementary material for: Adamantyl-based benzocyclobutene low-k polymers with good physical properties and excellent planarity
Source: Royal Society of Chemistry journal article supplement (doi:10.1039/c4tc02854f), 2015-01-01
Supplement: c4tc02854f1.pdf [file c4tc02854f1.pdf]

## Adamantyl-based benzocyclobutene low-*k* polymers with good physical properties and excellent planarity

Lingqiang Kong, Yuanrong Cheng, Yunxia Jin, Zhidong Ren, Yan Li, Fei Xiao\*

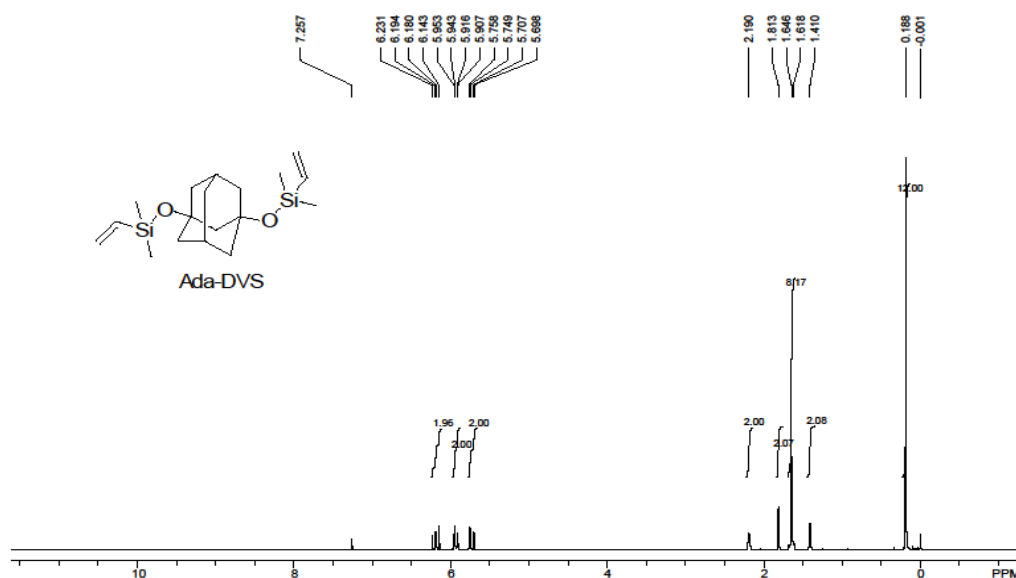

Fig. S1 <sup>1</sup>H NMR spectrum of precursor Ada-DVS (400MHz, CDCl<sub>3</sub>)

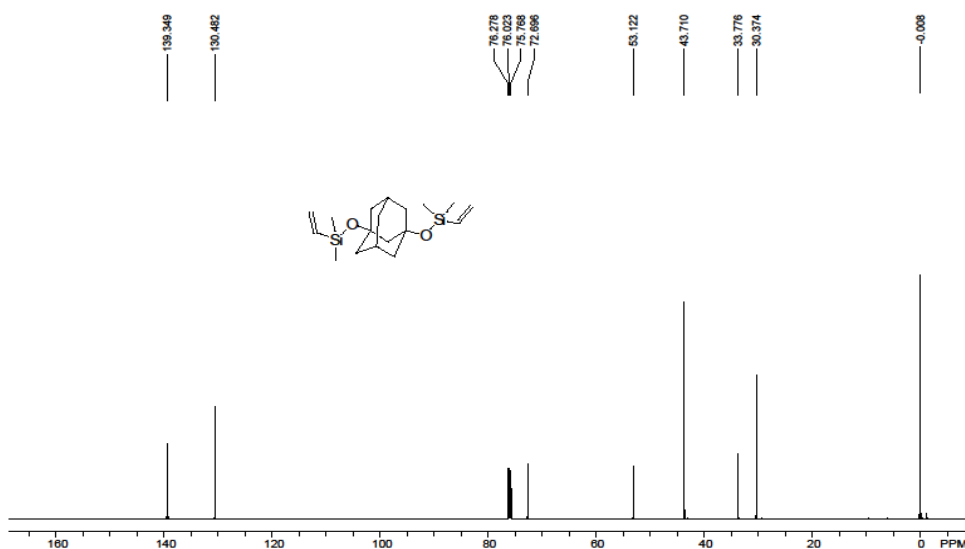

\* Department of Materials Science, Fudan University, 220 Handan Road, Shanghai 200433, P.R. China  
Correspondence to: Fei Xiao (E-mail: feixiao@fudan.edu.cn)

† Electronic Supplementary Information (ESI) available: See DOI: 10.1039/b000000x/

Fig. S2  $^{13}\text{C}$  NMR spectrum of precursor Ada-DVS (400MHz,  $\text{CDCl}_3$ )

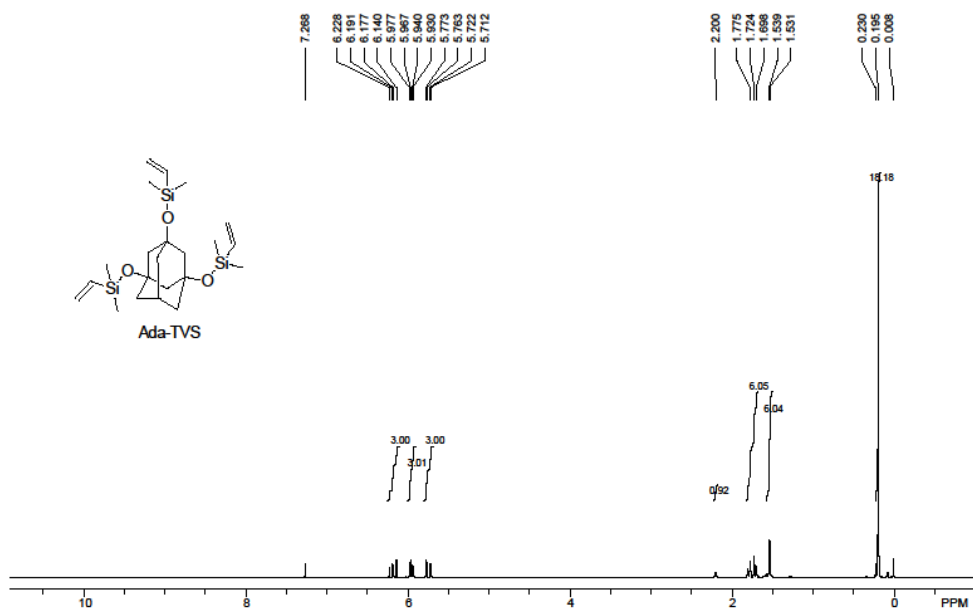

Fig. S3  $^1\text{H}$  NMR spectrum of precursor Ada-TVS (400MHz,  $\text{CDCl}_3$ )

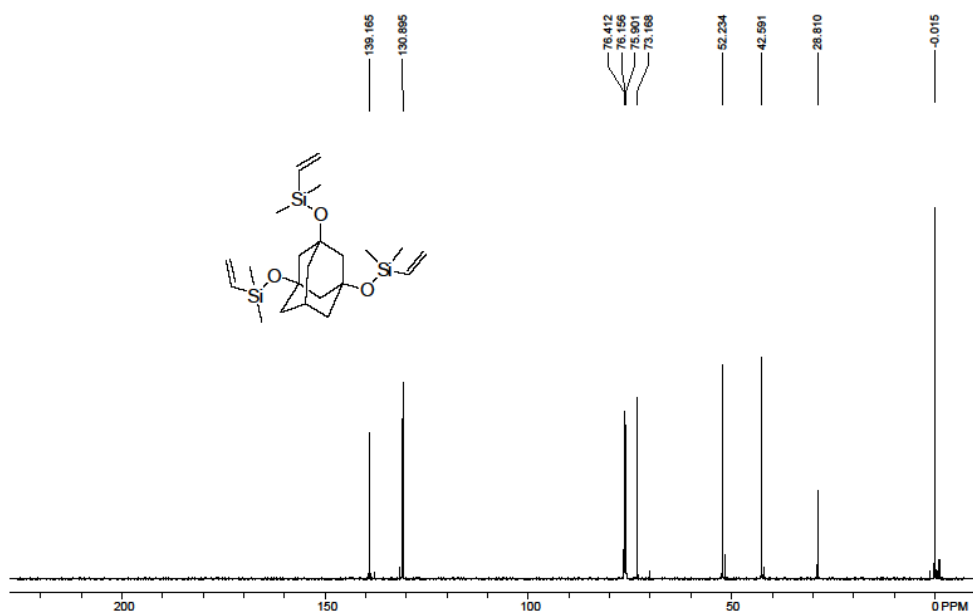

Fig. S4  $^{13}\text{C}$  NMR spectrum of precursor Ada-TVS (400MHz,  $\text{CDCl}_3$ )
